1 **Title:** Predictive visual motion extrapolation emerges spontaneously and without  
2 supervision from a layered neural network with spike-timing-dependent  
3 plasticity

4  
5 **Abbreviated Title:** Predictive visual motion through spike-based learning

6  
7 **Authors:** Anthony N. Burkitt\*<sup>1</sup> & Hinze Hogendoorn<sup>2</sup>

8  
9 **Affiliations:**

10 <sup>1</sup>Department of Biomedical Engineering, The University of Melbourne, Melbourne, VIC 3010, Australia

11 <sup>2</sup>Melbourne School of Psychological Sciences, The University of Melbourne, Melbourne, VIC 3010,  
12 Australia

13 **\*Correspondence:** [aburkitt@unimelb.edu.au](mailto:aburkitt@unimelb.edu.au)

14

15 Number of pages: 29

16 Number of figures: 8

17 Number of words for abstract: 220

18 Number of words for introduction: 929

19 Number of words for discussion: 1747

20

21 **Conflict of Interest:** The authors declare no competing financial interests.

22

23 **Acknowledgments:** HH acknowledges support from the Australian Research Council's Discovery  
24 Projects funding scheme project DP180102268. ANB acknowledges funding from the Australian  
25 Government, via grant AUSMURIB000001 associated with ONR MURI grant N00014-19-1-2571. We  
26 thank Drs. Hamish Meffin and Stefan Bode for helpful comments on the manuscript.

27 **Abstract**

28 The fact that the transmission and processing of visual information in the brain takes time presents a  
29 problem for the accurate real-time localisation of a moving object. One way this problem might be  
30 solved is extrapolation: using an object's past trajectory to predict its location in the present moment.  
31 Here, we investigate how a simulated *in silico* layered neural network might implement such  
32 extrapolation mechanisms, and how the necessary neural circuits might develop. We allowed an  
33 unsupervised hierarchical network of velocity-tuned neurons to learn its connectivity through spike-  
34 timing dependent plasticity. We show that the temporal contingencies between the different neural  
35 populations that are activated by an object as it moves causes the receptive fields of higher-level  
36 neurons to shift in the direction opposite to their preferred direction of motion. The result is that  
37 neural populations spontaneously start to represent moving objects as being further along their  
38 trajectory than where they were physically detected. Due to the inherent delays of neural  
39 transmission, this effectively compensates for (part of) those delays by bringing the represented  
40 position of a moving object closer to its instantaneous position in the world. Finally, we show that this  
41 model accurately predicts the pattern of perceptual mislocalisation that arises when human observers  
42 are required to localise a moving object relative to a flashed static object (the flash-lag effect).

43

44 **Significance Statement**

45 Our ability to track and respond to rapidly changing visual stimuli, such as a fast moving tennis ball,  
46 indicates that the brain is capable of extrapolating the trajectory of a moving object in order to predict  
47 its current position, despite the delays that result from neural transmission. Here we show how the  
48 neural circuits underlying this ability can be learned through spike-timing dependent synaptic  
49 plasticity, and that these circuits emerge spontaneously and without supervision. This demonstrates  
50 how the neural transmission delays can, in part, be compensated to implement the extrapolation  
51 mechanisms required to predict where a moving object is at the present moment.

52 **1. Introduction**

53 The transmission and processing of information in the nervous system takes time. In the case of visual  
54 input to the eyes, for example, it takes up to ~50-70 milliseconds for information from the retina to  
55 reach the primary visual cortex (Maunsell and Gibson, 1992; Lamme and Roelfsema, 2000), and up to  
56 ~120 milliseconds before human observers are able to initiate the first actions based on that  
57 information (Thorpe et al., 1996; Kirchner and Thorpe, 2006). Because events in the world continue  
58 to unfold during this time, visual information becomes progressively outdated as it travels up the  
59 visual hierarchy.

60 Although this is inconsequential when visual stimuli are unchanging on this time scale, these delays  
61 pose a problem when input is time-varying, for instance in the case of visual motion. If neural delays  
62 were not somehow compensated, we would consistently mislocalise moving objects behind their true  
63 positions. However, humans and many other visual animals are strikingly accurate at interacting with  
64 even fast moving objects (Smeets et al., 1998), suggesting that the brain implements some kind of  
65 mechanism to compensate for neural delays.

66 One candidate mechanism by which the brain might compensate for delays is prediction (Nijhawan,  
67 2008). In the case of motion, the brain might use an object's previous trajectory to extrapolate its  
68 current position, even though actual sensory input about the object's current position will not become  
69 available for some time. Consistent with this interpretation, motion extrapolation mechanisms have  
70 been demonstrated in multiple levels of the visual hierarchy, including the retina of salamanders,  
71 mice, and rabbits (Berry et al., 1999; Hosoya et al., 2005; Schwartz et al., 2007), cat lateral geniculate  
72 nucleus (Sillito et al., 1994), and both cat and macaque primary visual cortex (Jancke et al., 2004;  
73 Subramaniyan et al., 2018; Benvenuti et al., 2019). In humans, recent EEG and MEG studies using  
74 apparent motion similarly revealed predictive activation along motion trajectories (Hogendoorn and  
75 Burkitt, 2018; Aitken et al., 2020; Blom et al., 2020; Robinson et al., 2020), and motion extrapolation

76 mechanisms have been argued to be the cause of the so-called flash-lag effect (Hogendoorn, n.d.;  
77 Nijhawan, 1994; Khoei et al., 2017).

78 The existence of predictive mechanisms at multiple stages of the visual hierarchy is reminiscent of  
79 hierarchical predictive coding, a highly influential model of cortical organisation (Rao and Ballard,  
80 1999). In this model, multiple layers of a sensory hierarchy send predictions down to lower levels,  
81 which in turn send prediction errors up to higher levels. In this way, the hierarchy essentially infers  
82 the underlying causes of incoming sensory input, using prediction errors to correct and update that  
83 inference. It is important to note, however, that the “predictions” in predictive coding are hierarchical,  
84 rather than temporal: predictive coding networks ‘predict’ (or reconstruct) activity patterns in other  
85 layers, rather than predicting the future. Consequently, the conventional formulation of predictive  
86 coding cannot compensate for neural delays. In fact, we previously argued that neural delays pose a  
87 specific problem for hierarchical predictive coding, because descending hierarchical predictions will  
88 be misaligned in time with ascending sensory input (Hogendoorn and Burkitt, 2019). For any time-  
89 varying stimulus (such as a moving object) this would lead to significant (and undesirable) prediction  
90 errors.

91 To address this, we previously proposed a Real-Time Temporal Alignment hypothesis, which extends  
92 the predictive coding framework to account for neural transmission delays (Hogendoorn and Burkitt,  
93 2019). In this hypothesis, both forward and backward connections between hierarchical layers  
94 implement extrapolation mechanisms to compensate for the incremental delay incurred at that  
95 particular step. Without these extrapolation mechanisms, delays progressively accumulate as  
96 information flows through the visual hierarchy, such that information at higher hierarchical layers is  
97 outdated relative to information at lower hierarchical layers. Conversely, the striking consequence of  
98 the Real-Time Temporal Alignment hypothesis is that for a predictable stimulus trajectory, different  
99 layers of the visual hierarchy become aligned in time. The hypothesis posits that extrapolation  
100 mechanisms are implemented at multiple stages of the visual system, which is consistent with the  
101 neurophysiological findings outlined above, as well as with human behavioural experiments (van

102 Heusden et al., 2019). However, a key question that remains is how such extrapolation mechanisms  
103 are implemented at the circuit level, and how those neural circuits arise during development.

104 Here, we address those two questions by simulating *in silico* the first two layers of a feedforward  
105 hierarchical neural network sensitive to visual motion. We present the network with simulated moving  
106 objects, and allow neurons to learn their connections through spike-time dependent plasticity (STDP;  
107 Markram et al., 1997; Bi and Poo, 1998), a synaptic learning rule that strengthens and weakens  
108 synapses contingent on the relative timing of input and output action potentials. We focus on the first  
109 two layers of the hierarchical network to explore the key mechanisms, which would be expected to  
110 occur at each higher level of the hierarchy.

111 We show that when a motion-sensitive hierarchical network is allowed to learn its connectivity  
112 through STDP (without supervision), the temporal contingencies between the different neural  
113 populations that are activated by the object as it moves cause the receptive fields of higher-level  
114 neurons to spontaneously shift in the direction opposite to their preferred direction of motion. As a  
115 result, they start to encode the extrapolated position of a moving object along its trajectory, rather  
116 than its physical position. However, due to the delays inherent in neural transmission, this mechanism  
117 actually brings the represented position of the object closer to its instantaneous position in the world,  
118 effectively compensating for (part of) those delays. Finally, we show that the behaviour of the resulting  
119 network predicts the pattern of velocity-dependence in the perceptual localisation of moving objects.

120

## 121 **2. Methods**

### 122 2.1. Network Architecture

123 The network architecture considered here is one in which a moving object generates a visual input  
124 stimulus that is encoded at each layer of the network by a population code that represents both the  
125 position and velocity of the stimulus. This population code includes sub-populations of neurons tuned  
126 to both position and velocity, as has previously been proposed by Khoei et al. (2017) and consistent

127 with the known velocity-tuning of a large proportion of visual neurons in the early visual system  
128 (Orban et al., 1986). Three layers of the network are shown schematically in Figure 1A, in which there  
129 are  $N_n$  position sub-populations at each layer. Although both classical predictive coding and the Real-  
130 Time Temporal Alignment hypothesis posit both feed-forward and feedback connections, here we  
131 consider only feed-forward connections as proof-of-principle. In addition, in a more general scheme  
132 lateral weights at each layer could also be included, as previously proposed by Jancke and Erlhagen  
133 (Jancke and Erlhagen, 2010), but these are neglected here.

134 The neural activation of each stage of processing feeds forward to the following stage. An important  
135 aspect of the network architecture is that each neural population receives input from a limited  
136 receptive field of neural populations at the preceding stage. In this way, the receptive field size of  
137 neural populations increases as the activity propagates to higher stages of processing.

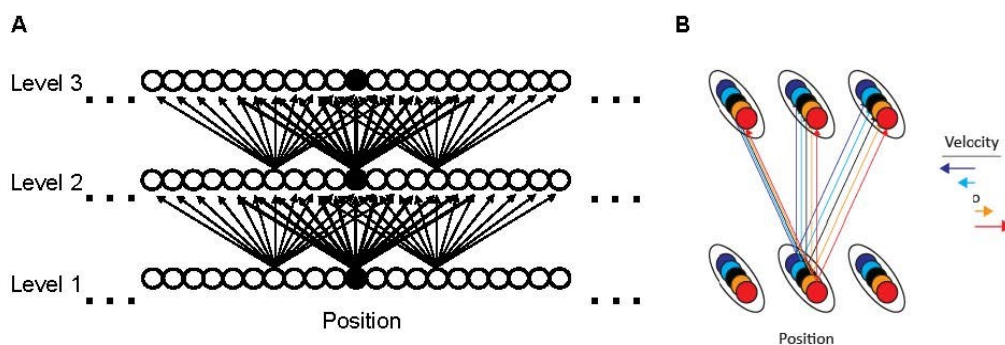

138

139 *Figure 1: A. Schematic illustration of a portion of the first three layers of the network architecture. The*  
140 *circles denote the neural population at each of the  $N_n$  positions (fifteen shown, with the central*  
141 *population in black). The straight lines indicate the possible non-zero weights connecting the neural*  
142 *populations between layers, which have a limited spatial spread. The arrows indicate the direction of*  
143 *the neural connectivity (pre-synaptic to post-synaptic) and only the weights for a subset of neurons is*  
144 *illustrated. B. Each position population is further divided into  $M$  velocity-tuned sub-populations. Each*  
145 *velocity-tuned sub-population projects to sub-populations in the subsequent layer with the same*  
146 *velocity-tuning.*

147

## 148 2.2 Neural Model

149 The population place code of the stimulus at every stage of processing is described by a set of  $N_n$  units  
150 representing overlapping place fields, equally distributed over the interval  $[0, 1]$  and each with an  
151 identical Gaussian distribution width  $\sigma_p$ . This width represents the number of *independent* place fields,  
152  $N_p$ , in the input layer, given by  $N_p = 1/\sigma_p$ . In this network, the Gaussian distribution represents the  
153 activity evoked by a stimulus, as illustrated in Figure 2, in which the neural activity of each population  
154 of active input neurons corresponding to a particular place field (i.e., an object at a particular location)  
155 is represented by a different colour, and the Gaussian curve represents the amplitude of the firing-  
156 rate of each neuron in that population. The firing rate, which represents the rate of action potentials,  
157 is described by a Poisson process, with a base firing rate of 5Hz in the absence of stimulation. Note  
158 that periodic boundary conditions are used, so that the position code can equivalently be represented  
159 by place on a circle. For simplicity, we consider the situation where only one object activates the input  
160 at any time, so that the relative activations of the input neurons give a neural representation of the  
161 position of the object.

162 A layered network structure is considered, in which the units at the input layer feed their activity  
163 forward to the following layer, which has the same number of units,  $N_n$ . For simplicity, the layers are  
164 taken to have an equal spatial separation and the propagation delay time for activity between layers  
165 has a constant value  $t_{\text{delay}}$ . This neural transmission delay is of the order of several milliseconds  
166 between layers of the hierarchy (Maunsell and Gibson, 1992).

167 To incorporate velocity, each place field is further subdivided into  $M$  distinct sub-populations,  
168 corresponding to  $M$  different velocities (or velocity intervals) for the input stimulus, as illustrated in  
169 Figure 1B. The velocity of the object is encoded by the activity in the corresponding sub-population of  
170 the place fields. Consequently, an object moving at a constant velocity will primarily activate one  
171 velocity sub-population within each place field, i.e., for simplicity a discrete (quantised) representation

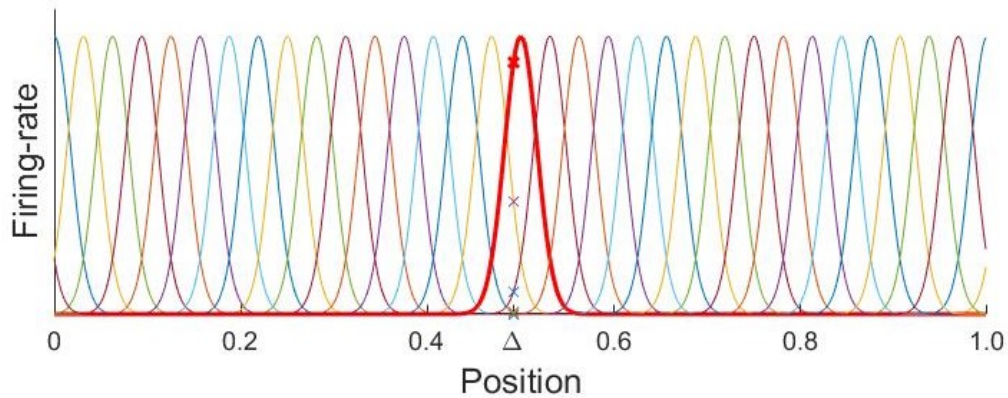

172

173 *Figure 2: Place code in first (input) layer: Each colour represents the neural activity of the population*  
174 *of neurons, illustrated here for  $N_p = 32$  positions corresponding to the location of the peak of each*  
175 *Gaussian curve, with width  $\sigma_p = 1/N_p$ . A stimulus at the position indicated on the plot by  $\Delta$  generates*  
176 *firing rates in the neural population, whose amplitude is indicated by the crosses on the corresponding*  
177 *place curves. The place distribution of population activity for a stimulus centred at the position  $x = 0.5$*   
178 *is shown in bold-red.*

179

180 of velocity is considered rather than a continuous representation. The velocity is assumed here to have  
181 been encoded by an earlier stage of neural processing, such as in the retina, so that the details of how  
182 this encoding occurs are not incorporated into the model. It suffices that velocity is encoded at each  
183 stage of the processing, which is a reasonable assumption as it is known that velocity is present in  
184 higher stages of the visual pathway such as area MT (Movshon and Newsome, 1996).

185

### 186 2.3 Neural Learning

187 We require that the computations that underlie learning in the network must be based upon known  
188 principles of synaptic plasticity, namely that the change in a synaptic strength is activity dependent  
189 and local. The locality constraint of synaptic plasticity requires that changes in the synaptic strength  
190 (i.e., the weight of a connection) can only depend on the activity of the presynaptic neuron and the



191 postsynaptic neuron. Consequently, the spatial distribution of the synaptic changes in response to a  
192 stimulus are confined to the spatial extent of the position representation of the stimulus, which has  
193 important consequences for the structure of the network that emerges as a result of learning.

194 In the full network the weights are described by a matrix,  $\mathbf{W}$  between every pair of successive layers.  
195 Since our focus here will be upon the first two layers,  $\mathbf{W}$  is taken to be a  $N_n \times N_n$  matrix in which the  
196 elements  $W_{ji}$  are the weights between the first two layers. The locality constraint is implemented in  
197 the network by requiring that the weights from a neuron at location  $i$  in the first layer has a probability  
198 of being connected to a neuron at location  $j$  in the second layer that is Gaussian, namely that

$$\text{Prob}\{W_{ji} \neq 0\} = \frac{1}{\sigma_W \sqrt{2\pi}} \exp\left(-\frac{(x_i - x_j)^2}{2\sigma_W^2}\right), \quad (1)$$

199 where  $\sigma_W$  is the width of the Gaussian distribution and  $x_i$  and  $x_j$  are the locations of the neurons  $i$  and  
200  $j$ , resp. In simulations, the amplitudes of the non-zero weights are initialized randomly and given small  
201 positive initial values,  $w_{\text{init}} = 0.01$ , while the zero-valued weights are fixed throughout (i.e.,  
202 corresponding to the absence of any synaptic connection between the two neurons). In simulations  
203 this Gaussian distribution was truncated to zero at  $5\sigma_W$ . The non-zero weights then evolve according  
204 to Spike-Timing Dependent Plasticity (STDP), namely a change of the weight,  $\Delta W_{ji}$ , will occur when  
205 an input spike generated by neuron  $i$  at time  $t_i$  arrives after a time-delay  $t_{\text{delay}}$  at a synapse on neuron  
206  $j$ , and an output spike occurs at this neuron at time  $t_j$ , so that the time difference  $\Delta t$  lies within the  
207 STDP time-window  $F_{\text{STDP}}(\Delta t)$

$$\Delta W_{ji} = \rho F_{\text{STDP}}(t_j - t_i - t_{\text{delay}}), \quad (2)$$

208 where  $\rho$  is the learning rate and

$$F_{\text{STDP}}(\Delta t) = \begin{cases} c_p e^{\Delta t / \tau_p}, & t > 0 \\ 0, & t = 0 \\ -c_d e^{-\Delta t / \tau_d}, & t < 0, \end{cases} \quad (3)$$

209 with coefficients of potentiation and depression given by  $c_p$  and  $c_d$ , and time constants of potentiation  
210 and depression given by  $\tau_p$  and  $\tau_d$  resp., and  $\Delta t = (t_j - t_i - t_{\text{delay}})$  is the difference between the  
211 arrival of the synaptic input at time  $t_i + t_{\text{delay}}$  and the spike output at time  $t_j$ . Throughout the  
212 simulations balanced STDP was used, i.e., the STDP time-window has an equal amount of potentiation  
213 and depression, with  $c_p = c_d = 1$  and  $\tau_p = \tau_d = 20\text{ms}$ . An upper bound on the individual weights,  $w_{\text{max}}$ ,  
214 ensures that the weights do not grow unbounded.

215

## 216 2.4 Neural Simulations

217 Simulations of a network were carried out using MATLAB with  $N_n = 2000$  neurons at both the input  
218 layer and the first layer. The input layer had  $N_p = 32$  place-fields, i.e., the width  $\sigma_p$  of the Gaussian  
219 place-fields on the input layer was chosen to be  $\sigma_p = 1/N_p$  in order to give place-fields that were both  
220 localized and had a reasonable amount of overlap. The weight distribution width,  $\sigma_w$ , was also chosen  
221 to be  $\sigma_w = 1/N_p$ , and the width of the resulting place field  $\sigma_{\text{RF},j}$  of each neuron in the second layer was  
222 measured from the distribution of weights after learning by spatially binning the weight amplitudes  
223 and finding the width of the resulting histogram, fit to a normal distribution. The width of the place  
224 fields in the second layer are distributed around a value that will shift depending upon the velocity of  
225 the stimulus, so these are labelled as  $\sigma_{\text{RF},v}$ , to indicate this velocity-dependence. A time-step of 1ms  
226 was used for the simulations, and velocities over the range  $v \in [0, 5]$ , where the units of velocity are  
227 represented in terms of the inverse time ( $\text{sec}^{-1}$ ) taken to traverse the full spatial range  $x \in [0, 1]$ .

228

## 229 3. Results

230 The analysis here focuses upon the first two layers of the network, since the structure and function of  
231 the network follows the same principles at each successive level of the layered network.

### 232 3.1. Stationary input stimulus

233 In order to illustrate the effects of a moving stimulus and to have a baseline for comparison, we  
234 consider first the case with stationary inputs, i.e., in which the stimulus velocity is zero. We use a single  
235 point stimulus with an amplitude 20 times greater than the base firing rate. In this case, there is no  
236 change in stimulus position over time, but rather stationary stimuli are presented for short periods of  
237 time at random positions. When the stimulus activates the input, it will generate activity in the units  
238 at the first layer, as described in Section 2.2 and illustrated in Figure 2. Because this generates constant  
239 input to layer two, and a balanced STDP window is used, convolution by the STDP function would not  
240 be expected to systematically change synaptic weights. Consequently, the network maintains a stable  
241 position code in each layer of the network, namely a localized (Gaussian-like) place field at each layer  
242 that arises through the variance of the STDP learning of the weights (Kempster et al., 1999).

243 The organisation of the receptive fields of the neural populations in the second layer therefore simply  
244 reflects the input in the first layer, which has a spatial spread  $\sigma_p$ , and the activity transmitted through  
245 the weights, which has a spatial spread of  $\sigma_w$ . Figure 3 shows the results of a simulation for this case,  
246 in which the neural population in the second layer generates a place field representation of the input,  
247 as expected. The weights are initialized with a small value and then evolve under STDP, as described  
248 in the Methods. In this way, the width of the place field distribution at any layer depends upon the  
249 width of the place field at the preceding layer and the spatial spread of the synaptic connections that  
250 connect the two layers.

251

### 252 3.2. Moving input stimulus

253 We now consider the case where the same point-stimulus is moving. The velocity is chosen to have a  
254 discrete representation (i.e., a discrete number of velocities are chosen for simplicity, rather than a  
255 continuous representation), the place input distribution is as described above by a Gaussian  
256 distribution of width  $\sigma_p$ , as outlined above, and a simulation time step  $\Delta t=1\text{ms}$  is used. A stimulus

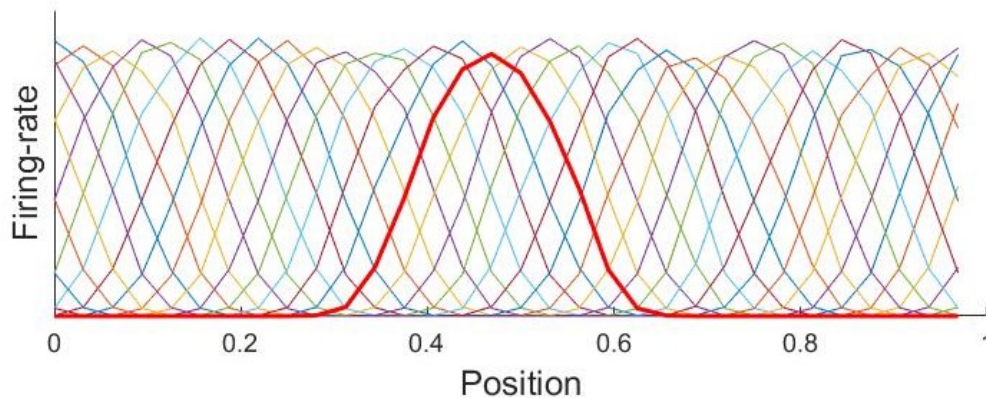

257

258 *Figure 3: Place code in the second layer generated by learning: Each colour represents the neural*  
259 *activity of a population of neurons, illustrated here for a simulation with  $N_p = 32$  position populations*  
260 *in the second layer. The place distribution for the population centred at the position  $x = 0.5$  is shown in*  
261 *bold.*

262

263 moving at a velocity  $v$  has a place representation that changes over time so that at a time  $\Delta t$  later it  
264 has shifted a distance  $\Delta x = v \Delta t$ . A moving object will sequentially activate successive populations of  
265 Level 1 neurons, which in turn project to Level 2. Importantly, a neuron in level 2 receiving input from  
266 level 1 neurons driven by this moving object will tend to fire more as the stimulus moves towards the  
267 centre of its place field. Due to STDP, inputs that arrive at the Level 2 neuron relatively early (before  
268 its peak firing rate) will be potentiated, whereas inputs that arrive relatively late are likely to be  
269 depressed. Consequently, the synapses connecting a given Level 2 neuron to Level 1 neurons centred  
270 on the direction from which the stimulus is arriving will tend to be potentiated by STDP. Conversely,  
271 the synapses on the other side (i.e., where the stimulus departs from the place field), will tend to be  
272 depressed, since the inputs on average arrive after the peak in output spiking activity.

273

274 We therefore hypothesise that for neural populations tuned to visual motion, the pattern of arrival of  
275 synaptic inputs, together with STDP, will tend to potentiate the synapses in the incoming direction of

276 the stimulus and depress synapses in the departing direction of the stimulus. This would then lead to  
277 an overall shift of the place field in the direction towards the incoming stimulus. Moreover, due to the  
278 limited temporal window of STDP, the shift in the place fields of the level 2 neurons would be expected  
279 to be larger for larger velocities.

280

281 To investigate this hypothesis, we simulated the activity of the neural network when it was presented  
282 with simulated objects moving at a range of velocities, and investigated the evolution of the receptive  
283 fields of Level 2 populations over time. We investigated neural populations tuned to 26 velocities,  
284 from 0 to 5 cycles per second in steps of 0.2 cycles per second (since we used periodic boundaries,  
285 one cycle is equivalent to traversing the full range of positions once). Because of the symmetry in our  
286 neural model, we only considered rightwards velocities, but the network behaves equivalently for  
287 leftward velocities. Each simulation ran for 5 simulated seconds (5,000 timesteps of  $\Delta t = 1\text{ms}$ ). The  
288 simulated object at a single location provided input to the Level 1 neurons according to their  
289 respective place fields.

290

291 To evaluate whether receptive fields indeed shifted as a result of learning, we calculated the mean  
292 receptive field of all Level 2 neurons at each timestep by aligning the 32 Level 2 place fields and  
293 averaging their receptive fields at that timestep. This yielded a mean receptive field as a function of  
294 simulation time for each velocity. Figure 4 shows the evolution of receptive field position over time  
295 for 6 evenly-spaced velocities (0-5 cycles/s).

296

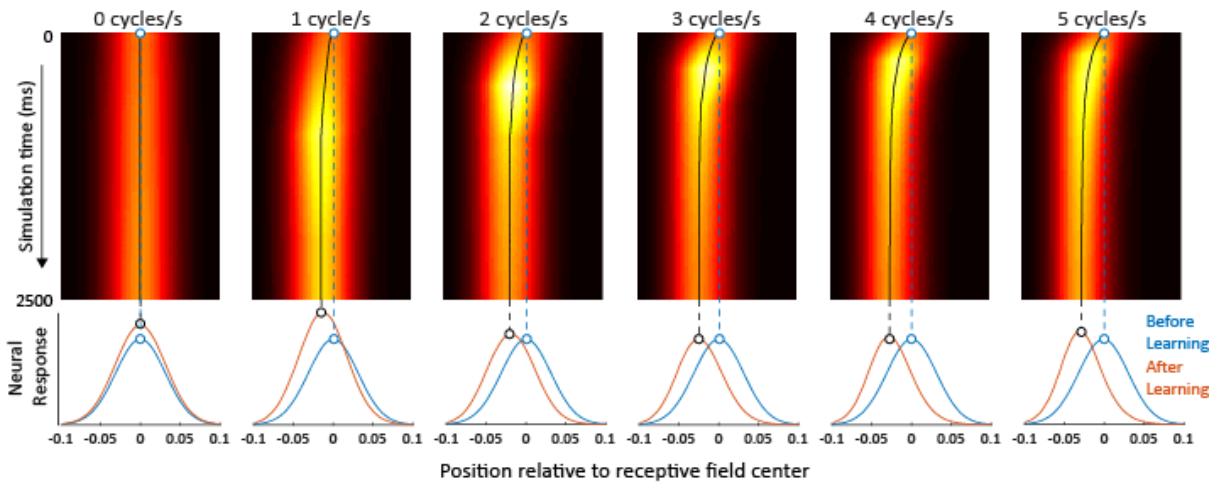

297

298 *Figure 4: Simulated receptive field position of level 2 neural populations as a function of learning, for*  
299 *6 different rightward velocities. Top row: In each panel, the colours in each row of pixels show the*  
300 *horizontal receptive field position at a single time-step, with hot colours indicating stronger*  
301 *connections to incoming signals from level 1 populations centred on that position. The center of the*  
302 *receptive field at each timepoint is marked by a black line. For clarity, only the first 2500 ms of the*  
303 *simulation are shown. Bottom row: mean receptive fields before (blue) and after learning (red).*  
304 *Altogether, these plots reveal that when velocity-tuned neural populations are presented with their*  
305 *preferred stimulus (here rightward), STDP causes their receptive field to shift over time in the direction*  
306 *opposite to their preferred velocity (i.e., here leftward).*

307

### 308 3.3. Velocity-dependence

309 To be able to directly compare how the evolution of level 2 receptive fields depended on velocity, for  
310 each velocity we fitted Gaussians to the average receptive field at each time-step (e.g., each row in  
311 each panel in Figure 5). We then repeated the entire simulation 15 times to reduce the impact of  
312 stochastic noise. Subsequently, we averaged the horizontal centre of the best-fit Gaussians across all  
313 15 iterations. Finally, we plotted this receptive field centre as a function of time, separately for each  
314 velocity. The result is illustrated in Figure 5.

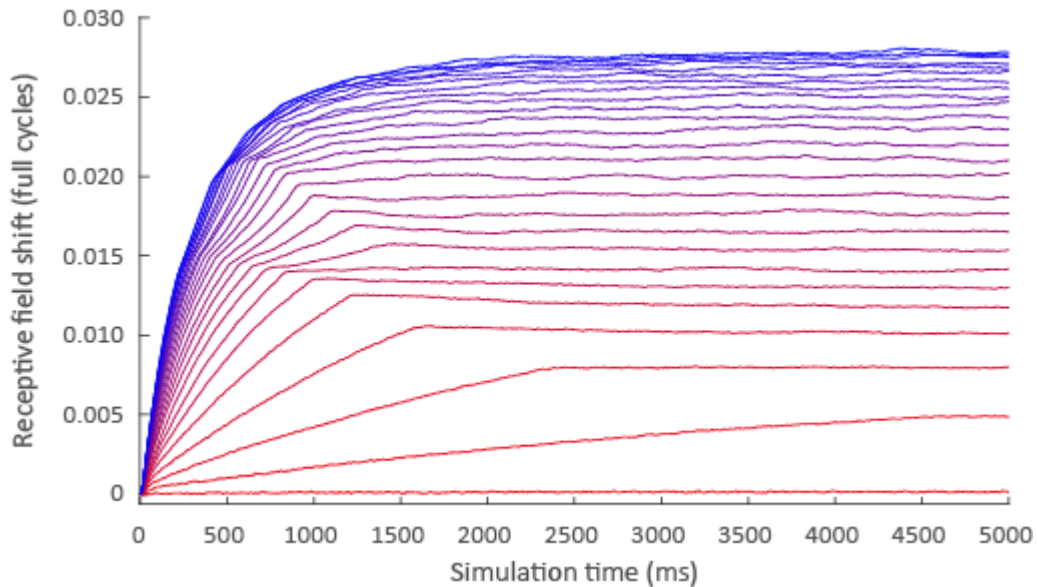

315

316 *Figure 5: The evolution of receptive field centre over time, as a function of velocity. Colours represent*  
317 *populations tuned to 26 equally-spaced velocities, ranging from zero (red) to 5 cycles/s (blue). For all*  
318 *non-zero velocities, receptive fields shifted against the direction of motion, with a clear monotonic*  
319 *relationship between velocity and the asymptotic magnitude of the shift.*

320

321 We observed two key features. Firstly, the initial rate at which the receptive field centres of the  
322 different velocity-tuned populations shifted increased with velocity. At zero velocity the receptive field  
323 centre stayed in the same position, and as velocity increased, the initial rate of change grew until it  
324 reached an asymptote. This is perhaps unsurprising, because at lower velocities the simulated object  
325 needs more time to traverse the receptive fields of a given number of neurons. As a result, the object  
326 drives fewer individual neurons, and in turn provides fewer opportunities for the network to learn.

327 Furthermore, the neural populations tuned to different velocities differed not only in their initial rate  
328 of change, but also in the asymptote of that change. In other words, the spatial shift in receptive field  
329 position at which subsequent time-steps produced no further net change in position increased with  
330 increasing velocity. This observation is significant because the asymptote represents the position of  
331 the receptive field after learning has effectively completed, and therefore reflects the stable situation

332 in visual systems that have had even a short history of exposure to moving stimuli. Because these  
333 velocity-tuned populations are subpopulations of an overall population coding for position (as  
334 illustrated schematically in Figure 2), the overall population effectively represents a moving object  
335 ahead of where a physically-aligned static stimulus is represented. As a consequence, we might expect  
336 the asymptotic receptive field shift to be similarly reflected in conscious perception as the  
337 instantaneous perceived position of a moving object.

338

### 339 3.4 Behavioural predictions

340 Our model reveals how STDP-induced shifts in receptive field position depend on velocity. In the final  
341 section of this paper, we evaluate the degree to which these predictions match observed  
342 dependencies on velocities in the localisation of moving objects by healthy human observers.

343 A much-studied behavioural paradigm used to probe the instantaneous perceived position of a moving  
344 object is the flash-lag paradigm, in which a flashed object is briefly presented alongside a moving  
345 object (Nijhawan, 1994). Observers are then required to report where they perceived the moving  
346 object to be at the moment the flashed object was presented. Strikingly, in this paradigm observers  
347 consistently localise the moving object ahead of the physically aligned flashed object, a phenomenon  
348 known as the flash-lag effect (Nijhawan, 1994). Although the mechanisms underlying this effect have  
349 been hotly debated over the last 25 years, convergent evidence supports Nijhawan's original proposal  
350 that it reflects some kind of neural motion extrapolation process (Hogendoorn, n.d.; Nijhawan, 1994).

351 What is particularly relevant to the present context is that the effect has been observed to scale with  
352 velocity (Wojtach et al., 2008): when an object moves faster, its perceived position at any given instant  
353 lies further along the object's trajectory.

354 In our model, the perceived position of a moving object corresponds to the level 2 neural population  
355 activated by that object. As outlined in the previous section, this is determined by the asymptotic  
356 receptive field position after learning. As a measure of asymptotic receptive field shift after learning,



357 we averaged the receptive field shift in the final 100 ms of our simulation (e.g., the 100 rightmost  
358 datapoints for each curve in Figure 5), averaged across the 15 iterations of the simulation. We  
359 subsequently fitted a logarithmic function to the data, as has previously been done for behavioural  
360 estimates of perceived position shifts using the flash-lag effect (Wojtach et al., 2008). This function  
361 explained a total of 96.8% of the variance, showing that the dependence of final receptive field  
362 position on velocity was very well described by a logarithmic relationship (Figure 6).

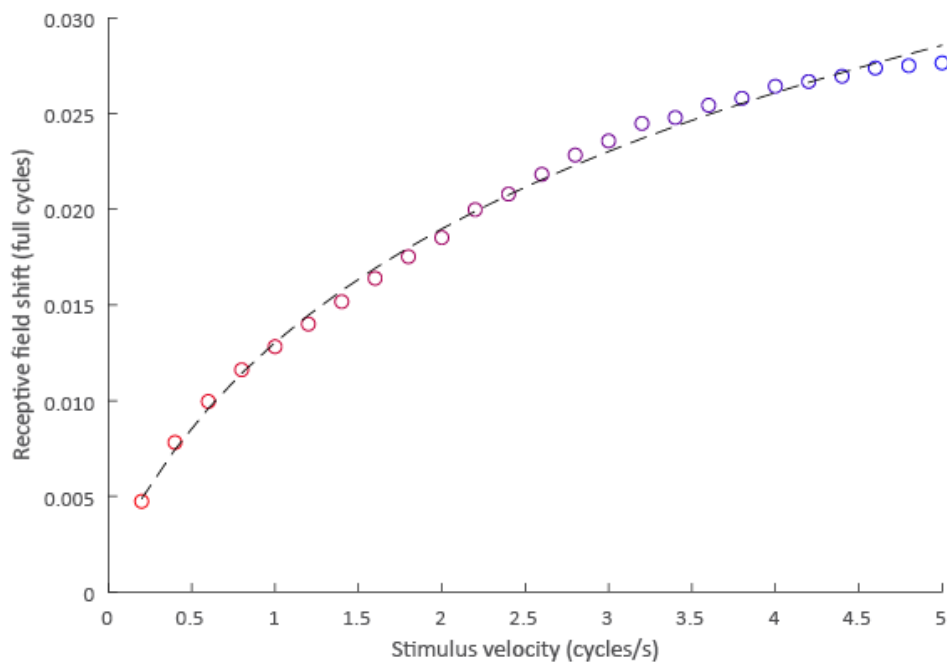

363

364 *Figure 6: Velocity-dependence of asymptotic receptive field shifts. Marker colours correspond to*  
365 *velocities in Figure 5, and the dashed line represents a logarithmic fit to the data, explaining 96.8% of*  
366 *variance.*

367

368 In order to compare the perceptual shifts predicted by our model to those measured in behavioural  
369 experiments with human observers, we compared the velocity dependence of receptive field shifts in  
370 our model to the velocity dependence of the Flash-Lag Effect (FLE), as previously measured for the full  
371 range of detectable velocities by (Wojtach et al., 2008). We noted that the magnitudes of both RF-  
372 shifts in our model and perceptual shifts in the FLE were very well-described by a logarithmic

373 dependence on stimulus velocity (Figure 6, Figure 7A). We then directly compared RF-shifts in our  
374 model to perceptual shifts in the FLE by treating the maximum velocities tested in each paradigm to  
375 be equal. For the behavioural paradigm, this was 50 deg/s, the highest velocity at which an FLE could  
376 be measured (Wojtach et al., 2008). For our model, this was 5 cycles/second, at which point the period  
377 of the motion (200 ms) reached the approximate width of the STDP window. The correlation between  
378 RF-shifts in our model and perceived position shifts in the FLE was near perfect ( $r > 0.99$ ). Note that  
379 this pattern of results arose spontaneously as a result of STPD, without requiring any tuning of the  
380 model. This shows that the velocity-dependence of STDP-induced receptive-field shifts in our model  
381 very closely matches the velocity-dependence of perceptual mislocalisation for moving objects as  
382 measured using the FLE.

383

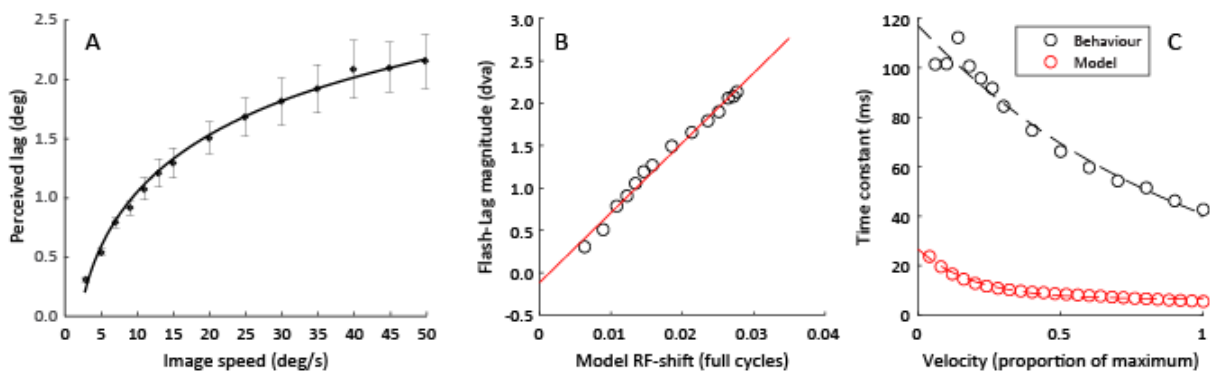

384

385

386 *Figure 7: A) Behaviourally measured perceptual shift magnitude as a function of velocity using the*  
387 *flash-lag effect (reproduced from (Wojtach et al., 2008). The solid line indicates a logarithmic fit to*  
388 *their data. B) Scatterplot showing the magnitude of receptive field shifts predicted by our model and*  
389 *the corresponding perceptual shifts reported by (Wojtach et al., 2008) using the FLE. The*  
390 *correspondence is near-perfect, with a Pearson correlation  $r > 0.99$ . C) Absolute magnitudes of RF-*  
391 *shifts produced by our model and position shifts observed in the FLE, expressed as a time-constant (the*  
392 *equivalent duration necessary to traverse the shift distance at each velocity). Dashed lines indicate*  
393 *exponential fits.*

394 Finally, we compared the absolute magnitude of the shifts in receptive field position produced by our  
395 model to the absolute magnitude of perceptual shifts observed in the FLE. To do so, we expressed the  
396 magnitude of the shift at each velocity as a time constant, by dividing shift magnitude by velocity. This  
397 is equivalent to the time necessary for an object moving at that velocity to be displaced a distance  
398 equivalent to the receptive field shift (Figure 7C). We observed that for both the FLE and our model,  
399 this time constant tended to decrease exponentially with increasing velocity (exponential fits  
400 explained 96.3% and 98.5% of variance in FLE and model time constants, respectively). Across the  
401 entire range of velocities tested, the time constant produced by our model was roughly 12-20% of the  
402 time constant for the behaviourally-measured FLE, as might be expected given that our model  
403 reflected receptive field shifts in just a single layer of synaptic connections.

404

### 405 3.5 Parameter dependence

406 Parameters in our model were chosen to be biologically plausible. For some parameters, choosing  
407 different values would be expected to have predictable effects. For example, varying the STDP learning  
408 rate  $\rho$ , Eq.(2), would be expected to cause the model to converge to its asymptotic state either more  
409 rapidly or more slowly. However, we would not expect it to change the asymptotic state itself – merely  
410 the simulation time necessary to reach that state. Indeed, we deliberately chose a relatively high  
411 learning rate in order to keep the computation tractable; we would not expect a biological system to  
412 reach its asymptotic state within just 5 seconds of exposure.

413 For other parameters, it is less obvious how choosing different values would affect the pattern of  
414 results. In particular, we chose a value of 32 for  $N_p$ , the number of place fields in each layer. This  
415 parameter corresponds loosely to the size of receptive fields at each layer, and might be expected to  
416 vary for neurons in different areas in retinotopic visual cortex. For example, place field width inevitably  
417 varies as a function of eccentricity, with foveal retinotopic areas showing smaller receptive fields than  
418 peripheral retinotopic areas. To investigate the effect of manipulating this parameter, we ran

419 additional simulations with higher (64) and lower (16) values of  $N_p$ . Although we observed small  
420 differences in the absolute magnitude of predicted receptive field shifts, the overall pattern of results  
421 was very similar (Figure 8). In particular, the pattern of velocity dependence for both absolute  
422 receptive field shifts and the equivalent time constants was highly similar, giving confidence that our  
423 results are not restricted to a small region of parameter space.

424

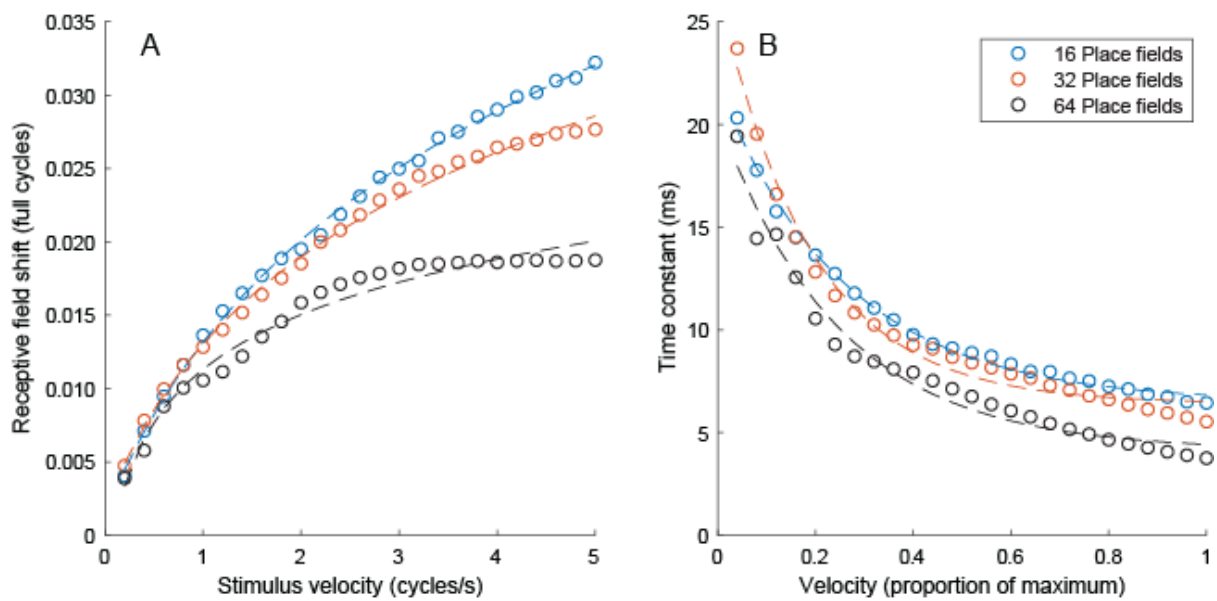

425

426 *Figure 8: Comparison of model prediction for different numbers of place fields. A) Receptive field shift*  
427 *as a function of velocity for models with 16, 32, or 64 place fields. The magnitude of the receptive field*  
428 *shift increases slightly with increasing place field width (corresponding to a lower number of place*  
429 *fields), but the overall pattern of velocity-dependence is comparable for all three simulations. Dashed*  
430 *lines show logarithmic fits as in the main analysis. B) Comparison of time constants for models with*  
431 *16, 32, or 64 place fields. Time constants were remarkably similar for models with different numbers*  
432 *of place fields, showing comparable exponential dependence on velocity. Dashed lines show*  
433 *exponential fits.*

434

435

#### 436 **4. Discussion**

437 We investigated a computational problem faced by the brain in processing the visual position of  
438 moving objects: the fact that neural transmission takes time, and that the brain therefore only has  
439 access to outdated visual information. Motion extrapolation is one way the brain might compensate  
440 for these delays: by extrapolating the position of moving stimuli along their trajectory, their perceived  
441 position would be closer to their physical position in the world (Hogendoorn, n.d.; Nijhawan, 1994,  
442 2008; Hubbard, 2005). We simulated a possible neural mechanism (spike-timing dependent plasticity  
443 - STDP) by which a layered neural network might implement such an extrapolation mechanism. We  
444 show that a two-layer hierarchical network comprising of velocity-tuned neural population is not only  
445 able to implement motion extrapolation, but actually learns to do so spontaneously without  
446 supervision, due only to the temporal contingencies of its connectivity. We go on to show that the  
447 velocity-dependence of the resulting receptive field shifts predicts previously reported, behaviourally  
448 measured effects on the perceived position of moving objects.

449 The magnitude of the receptive field shifts we observe for each velocity in our simulations corresponds  
450 roughly to the equivalent displacement resulting from 10-20 ms of motion at that velocity. Although  
451 this is 5-8 times smaller than the Flash-Lag Effect, it is important to note that our model includes just  
452 two layers, and only one stage at which learning takes place. If we were to extend our model to include  
453 additional layers, each with comparable properties, then each output layer would constitute the input  
454 layer for the synapses at the next stage. As a result, we would expect the same learning process, and  
455 therefore the same receptive field shift, to take place at each stage. In this way, receptive field shifts  
456 would add up as information ascends the hierarchy. Although it is unknown which cortical areas  
457 ultimately determine where we consciously perceive a moving object, it seems highly likely that  
458 information from the retina will cross at least a handful of synapses before it is accessed for conscious  
459 awareness. The magnitude of the receptive field shifts predicted by our model are therefore of roughly  
460 the same order of magnitude as, and comparable to, those we would expect based on the magnitude  
461 of the perceptual effect.

462

463 The magnitude of receptive field shifts predicted by our model is also consistent with previous  
464 neurophysiological recordings as well as human neuroimaging. Jancke and colleagues (Jancke et al.,  
465 2004) recorded neurons in cat primary visual cortex, and compared the latencies of responses to  
466 flashes with the latencies of responses to smoothly moving objects. They observed that peak neural  
467 responses to smoothly moving objects were approximately 16 ms further along the motion trajectory  
468 than peak responses to static flashed objects. Almost identical results were found by Subramaniyan  
469 and colleagues (Subramaniyan et al., 2018) who recorded neurons in primary visual cortex of awake  
470 macaques, and observed a latency advantage for moving stimuli compared to flashed stimuli of  
471 between 10-20 ms depending on stimulus velocity. These results from invasive recordings in cats and  
472 macaques are therefore in quantitative agreement with the predictions of our model. In humans, we  
473 recently used an EEG decoding paradigm to investigate the latency of neural responses to predictably  
474 and unpredictably moving objects (Hogendoorn and Burkitt, 2018). Using an apparent motion  
475 paradigm, we showed that when objects move along predictable trajectories, their position is  
476 represented with a lower latency than when they move along unpredictable trajectories. Like the  
477 neurophysiology studies, we observed a latency of 16 ms for the predictably moving object. Our  
478 present modelling result is therefore consistent not only with behavioural measurements of motion  
479 perception, but also with neural recordings in both humans and animals.

480

481 It is important to note that in our model, the extrapolation mechanism emerged spontaneously and  
482 without supervision, simply as a result of STDP. By extension, extrapolation would similarly be  
483 expected to develop spontaneously in *any* hierarchical network of velocity-selective populations when  
484 it is exposed to visual motion. Furthermore, it would be expected to arise between every layer in such  
485 a network. This structure of extrapolation mechanisms at multiple levels of the visual hierarchy is  
486 consistent with previous empirical findings showing extrapolation at both monocular and binocular  
487 stages of processing (van Heusden et al., 2019). It is also consistent with the Real Time Temporal

488 Alignment hypothesis that we recently proposed (Hogendoorn and Burkitt, 2019) as a theoretical  
489 extension of classical predictive coding (Rao and Ballard, 1999), although this hypothesis also posited  
490 feedback projections that are not included in our current model. Indeed, the network architecture  
491 considered here is entirely feed-forward, which represents a good model for the initial wave of neural  
492 activity travelling through the visual pathway in response to a stimulus, but it neglects the feedback  
493 activity from higher visual centres that would be evoked over longer time periods. This feedback  
494 activity is outside the scope of the present study and forms the focus of ongoing research.

495

496 The network and learning parameter values chosen for this proof-of-concept study represent values  
497 consistent with cortical neural processing, but without incorporating many of the details of vision  
498 processing in the human visual pathway. The description of the neural activity in terms of a Poisson  
499 process is a widely used approximation for the time distribution of action potentials. Although it  
500 neglects all spike after-effects, such as refractoriness, it nevertheless provides a good description for  
501 the situation examined here in which the visual stimulus moves with a constant velocity and is  
502 modelled as having a spatial intensity distribution that is Gaussian, without any edges or other spatial  
503 discontinuities (Aviel and Gerstner, 2006). The STDP time constants of potentiation and depression,  $\tau_p$   
504 and  $\tau_d$ , are chosen to both have a value of 20ms, which is in the range of that observed in neurons in  
505 the visual cortex (Froemke and Dan, 2002).

506

507 In the human visual system, the processing of motion begins in the retina, where it has long been  
508 known that there are direction-selective retinal ganglion cells (Barlow and Hill, 1963; Barlow et al.,  
509 1964). These neurons are maximally activated by motion in their preferred direction and strongly  
510 suppressed by motion in the opposite direction. Within the retina there are a number of mechanisms  
511 involving multilayered retinal circuits that provide reliable motion detection – for a review see Wei,  
512 (2018). This motion selective information is transmitted via the LGN to the primary visual cortex, V1,  
513 where direction selective neurons are concentrated in layer 4B of V1 and project from there to higher

514 motion processing areas of the visual hierarchy pathway, particularly area MT (Maunsell and van  
515 Essen, 1983).

516

517 In the analysis presented here we have made the simplifying assumption that the same principles  
518 apply at each successive level of a layered network. However, in the visual system the receptive fields  
519 of neurons at successive levels become progressively larger as information moves up the visual  
520 hierarchy. For example, a motion selective neuron in area MT which has a receptive field of  $10^0$   
521 diameter receives its input from neurons in V1 that have receptive fields of  $1^0$  diameter (Andersen,  
522 1997). The restricted receptive field of neurons in the lower stages of this vision processing hierarchy  
523 can result in ambiguous motion signals as a result of the aperture effect. Consequently, at each  
524 successive stage of the visual hierarchy the motion information is not only transmitted, but it also can  
525 be refined: the information at earlier stages is integrated so that the motion of larger objects can be  
526 more accurately determined and objects moving at different speeds are disambiguated – for a review  
527 see Bradley and Goyal (2008). The larger receptive field sizes in the higher stages of the hierarchy  
528 correspond to broader place field representations, which it would be straightforward to accommodate  
529 in a multi-layer extension of the processing framework presented here. It may also be possible that  
530 the dorsal and ventral pathways of the visual system (i.e., the where and the what pathways) have  
531 very different encoding of velocity. While the dorsal pathway relies upon an accurate representation  
532 of position and the visual motion extrapolation analysed here, it is possible that in the ventral pathway  
533 the velocity coding is so broadly tuned that it is effectively absent.

534 In the analysis presented here we have for convenience used a discrete coding of the velocity, rather  
535 than allowing it to take a continuum of values from zero up to some maximal value. Consequently, an  
536 object with changing velocity will, in this simplified model, make discrete jumps between velocity sub-  
537 populations. It is, however, also possible to formulate the velocity using such a continuous  
538 representation, for example as a set of overlapping Gaussian distributed velocity fields similar to the  
539 (spatial) place fields. We anticipate that this would give a smoother, possibly more biologically



540 plausible, transition between velocity sub-populations, but that it would not change the essential  
541 results of this study in any significant way.

542 In sum, we have implemented spike-time dependent plasticity in a layered network of velocity-  
543 selective neurons, and shown that this results in a pattern of receptive-field shifts that causes the  
544 network to effectively extrapolate the position of a moving object along its trajectory. The magnitude  
545 of this shift is in quantitative agreement with previous findings from both animal neurophysiology and  
546 human neuroimaging experiments, and also qualitatively predicts the perceptual mislocalisation of  
547 moving objects in the well-known flash-lag effect. Most strikingly, we show that it emerges  
548 spontaneously and without supervision, suggesting that extrapolation mechanisms are likely to arise  
549 in many locations and at many levels in the visual system.

550 Finally, the model we present here includes only feed-forward connections, and a natural extension  
551 to the model would be to include lateral and/or feedback connection. Previous modelling work, most  
552 notably by Jancke & Erlhagen (Jancke and Erlhagen, 2010), has proposed an instrumental role for  
553 lateral connections in generating the perceptual mislocalisation that characterises the flash-lag effect.  
554 It would be interesting to investigate in more detail what the emergent characteristics would be of a  
555 network implementing both STDP and lateral connectivity, and whether that would explain any other  
556 perceptual phenomenology. In a similar vein, it would be interesting to implement feedback  
557 connections in the model we present here, as we proposed in our previous Real-Time Temporal  
558 Alignment hypothesis (Hogendoorn and Burkitt, 2019). An exciting possibility is that these feedback  
559 connections might function to calibrate receptive field shifts to the relative transmission delays  
560 between layers in the hierarchy, allowing extrapolation mechanisms to accurately compensate for  
561 processing delays. Further research will be necessary to evaluate these possible extensions to the  
562 current model.

563

564

565 **6. References**

- 566 Aitken F, Turner G, Kok P (2020) Prior expectations of motion direction modulate early sensory  
567 processing. bioRxiv:2020.03.06.980672.
- 568 Andersen RA (1997) Neural Mechanisms of Visual Motion Perception in Primates. *Neuron* 18:865–  
569 872.
- 570 Aviel Y, Gerstner W (2006) From spiking neurons to rate models: A cascade model as an  
571 approximation to spiking neuron models with refractoriness. *Phys Rev E* 73:051908.
- 572 Barlow HB, Hill RM (1963) Selective Sensitivity to Direction of Movement in Ganglion Cells of the  
573 Rabbit Retina. *Science* (80- ) 139:412–412.
- 574 Barlow HB, Hill RM, Levick WR (1964) Retinal ganglion cells responding selectively to direction and  
575 speed of image motion in the rabbit. *J Physiol* 173:377–407.
- 576 Benvenuti G, Chemla S, Boonman A, Perrinet L, Masson G, Chavane F (2019) Anticipatory responses  
577 along motion trajectories in awake monkey area V1. bioRxiv:2020.03.26.010017.
- 578 Berry MJ, Brivanlou IH, Jordan TA, Meister M (1999) Anticipation of moving stimuli by the retina.  
579 *Nature* 398:334–338.
- 580 Bi GQ, Poo MM (1998) Synaptic modifications in cultured hippocampal neurons: Dependence on  
581 spike timing, synaptic strength, and postsynaptic cell type. *J Neurosci* 18:10464–10472.
- 582 Blom T, Feuerriegel D, Johnson P, Bode S, Hogendoorn H (2020) Predictions drive neural  
583 representations of visual events ahead of incoming sensory information. *Proc Natl Acad Sci*  
584 117:7510–7515.
- 585 Bradley DC, Goyal MS (2008) Velocity computation in the primate visual system. *Nat Rev Neurosci*  
586 9:686–695.
- 587 Froemke RC, Dan Y (2002) Spike-timing-dependent synaptic modification induced by natural spike

- 588 trains. *Nature* 416:433–438.
- 589 Hogendoorn H (n.d.) Motion Extrapolation in Visual Processing: the Resolution to 25 Years of Flash-  
590 Lag Debate.
- 591 Hogendoorn H, Burkitt AN (2018) Predictive coding of visual object position ahead of moving objects  
592 revealed by time-resolved EEG decoding. *Neuroimage* 171:55–61.
- 593 Hogendoorn H, Burkitt AN (2019) Predictive Coding with Neural Transmission Delays: A Real-Time  
594 Temporal Alignment Hypothesis. *eNeuro* 6:e0412-18.2019.
- 595 Hosoya T, Baccus SA, Meister M (2005) Dynamic predictive coding by the retina. *Nature* 436:71–77.
- 596 Hubbard TL (2005) Representational momentum and related displacements in spatial memory: A  
597 review of the findings. *Psychon Bull Rev* 12:822–851.
- 598 Jancke D, Erlhagen W (2010) Bridging the gap: a model of common neural mechanisms underlying  
599 the Fröhlich effect, the flash-lag effect, and the representational momentum effect. In: *Space  
600 and Time in Perception and Action* (Nijhawan R, Khurana B, eds), pp 422–440. Cambridge:  
601 Cambridge University Press.
- 602 Jancke D, Erlhagen W, Schöner G, Dinse HR (2004) Shorter latencies for motion trajectories than for  
603 flashes in population responses of cat primary visual cortex. *J Physiol* 556:971–982.
- 604 Khoei MA, Masson GS, Perrinet LU (2017) The Flash-Lag Effect as a Motion-Based Predictive Shift  
605 Sporns O, ed. *PLOS Comput Biol* 13:e1005068.
- 606 Kirchner H, Thorpe SJ (2006) Ultra-rapid object detection with saccadic eye movements: Visual  
607 processing speed revisited. *Vision Res* 46:1762–1776.
- 608 Lamme VAF, Roelfsema PR (2000) The distinct modes of vision offered by feedforward and recurrent  
609 processing. *Trends Neurosci* 23:571–579.
- 610 Markram H, Lübke J, Frotscher M, Sakmann B (1997) Regulation of synaptic efficacy by coincidence

- 611 of postsynaptic APs and EPSPs. *Science* 275:213–215.
- 612 Maunsell J, van Essen D (1983) The connections of the middle temporal visual area (MT) and their  
613 relationship to a cortical hierarchy in the macaque monkey. *J Neurosci* 3:2563–2586.
- 614 Maunsell JH, Gibson JR (1992) Visual response latencies in striate cortex of the macaque monkey. *J*  
615 *Neurophysiol* 68:1332–1344.
- 616 Movshon JA, Newsome WT (1996) Visual response properties of striate cortical neurons projecting  
617 to area MT in macaque monkeys. *J Neurosci* 16:7733–7741.
- 618 Nijhawan R (1994) Motion extrapolation in catching. *Nature* 370:256–257.
- 619 Nijhawan R (2008) Visual prediction: Psychophysics and neurophysiology of compensation for time  
620 delays. *Behav Brain Sci* 31:179–239.
- 621 Orban GA, Kennedy H, Bullier J (1986) Velocity sensitivity and direction selectivity of neurons in  
622 areas V1 and V2 of the monkey: influence of eccentricity. *J Neurophysiol* 56:462–480.
- 623 Rao RPN, Ballard DH (1999) Predictive coding in the visual cortex: A functional interpretation of  
624 some extra-classical receptive-field effects. *Nat Neurosci* 2:79–87.
- 625 Robinson AK, Grootswagers T, Shatek SM, Gerboni J, Holcombe AO, Carlson TA (2020) Now you see  
626 it, now you don't: Overlapping neural representations for the position of visible and invisible  
627 objects. *bioRxiv:2020.03.02.974162*.
- 628 Schwartz G, Taylor S, Fisher C, Harris R, Berry MJ (2007) Synchronized Firing among Retinal Ganglion  
629 Cells Signals Motion Reversal. *Neuron* 55:958–969.
- 630 Sillito AM, Jones HE, Gerstein GL, West DC (1994) Feature-linked synchronization of thalamic relay  
631 cell firing induced by feedback from the visual cortex. *Nature* 369:479–482.
- 632 Smeets JBJ, Brenner E, De Lussanet MHE (1998) Visuomotor delays when hitting running spiders. In:  
633 EWEP 5 - Advances in perception-action coupling (B B, A L, G D, A R-B, eds), pp 36–40. Paris:

634 Editions {EDK}.

635 Subramaniyan M, Ecker AS, Patel SS, Cotton RJ, Bethge M, Pitkow X, Berens P, Tolias AS (2018) Faster  
636 processing of moving compared with flashed bars in awake macaque V1 provides a neural  
637 correlate of the flash lag illusion. *J Neurophysiol* 120:2430–2452.

638 Thorpe S, Fize D, Marlot C (1996) Speed of processing in the human visual system. *Nature* 381:520–  
639 522.

640 van Heusden E, Harris AM, Garrido MI, Hogendoorn H (2019) Predictive coding of visual motion in  
641 both monocular and binocular human visual processing. *J Vis* 19:3.

642 Wei W (2018) Neural Mechanisms of Motion Processing in the Mammalian Retina. *Annu Rev Vis Sci*  
643 4:165–192.

644 Wojtach WT, Sung K, Truong S, Purves D (2008) An empirical explanation of the flash-lag effect. *Proc*  
645 *Natl Acad Sci* 105:16338–16343.

646
